# Supplementary material for: Ecology and seasonality of sandflies and potential reservoirs of cutaneous leishmaniasis in Ochollo, a hotspot in southern Ethiopia
Source: PLoS Negl Trop Dis. 2019 Aug 19;13(8):e0007667. doi: 10.1371/journal.pntd.0007667 (PMC6715250; doi:10.1371/journal.pntd.0007667)
Supplement: S4 Data — (XLSX) [file pntd.0007667.s010.xlsx]

## Sheet: Sheet1
Month	Loc_type	Loc_code	SF	Species
January	Rocky area	R17	8066	Other Phlebotomus spp.
January	Cave	C2	8573	P. pedifer
January	Cave	C2	8551	P. pedifer
January	Cave	C2	8500	P. pedifer
January	Cave	C2	8129	P. pedifer
January	Cave	C2	8117	P. pedifer
January	Cave	C2	7401	P. pedifer
January	Cave	C2	7404	P. pedifer
January	Cave	C2	7428	P. pedifer
January	Cave	C2	7443	P. pedifer
January	Cave	C2	7471	P. pedifer
January	Cave	C2	7484	P. pedifer
January	Cave	C2	7692	P. pedifer
January	Cave	C2	7904	P. pedifer
January	Cave	C2	7918	P. pedifer
January	Cave	C2	7923	P. pedifer
January	Cave	C2	7940	P. pedifer
January	Cave	C2	7944	P. pedifer
January	Cave	C2	7953	P. pedifer
January	Cave	C2	7984	P. pedifer
January	Cave	C2	7987	P. pedifer
January	Cave	C2	7990	P. pedifer
January	Cave	C2	8115	P. pedifer
January	Cave	C2	8120	P. pedifer
January	Cave	C2	8122	P. pedifer
January	Cave	C2	8128	P. pedifer
January	Cave	C2	8131	P. pedifer
January	Cave	C2	8134	P. pedifer
January	Cave	C2	8145	P. pedifer
January	Cave	C2	8148	P. pedifer
January	Cave	C2	8152	P. pedifer
January	Cave	C2	8161	P. pedifer
January	Cave	C2	8211	P. pedifer
January	Cave	C2	8225	P. pedifer
January	Cave	C2	8230	P. pedifer
January	Cave	C2	8240	P. pedifer
January	Cave	C2	8275	P. pedifer
January	Cave	C2	7780	P. pedifer
January	Cave	C2	7783	P. pedifer
January	Cave	C2	7858	P. pedifer
January	Cave	C2	8323	P. pedifer
January	Cave	C2	8326	P. pedifer
January	Cave	C2	8415	P. pedifer
January	Cave	C2	8293	P. pedifer
January	Cave	C2	8298	P. pedifer
January	Cave	C2	8507	P. pedifer
January	Cave	C2	8532	P. pedifer
January	Cave	C2	8574	P. pedifer
January	Cave	C2	8578	P. pedifer
January	Cave	C3	8560	P. pedifer
January	Cave	C3	8400	P. pedifer
January	Cave	C3	8061	P. pedifer
January	Cave	C3	7736	P. pedifer
January	Cave	C3	7550	P. pedifer
January	Cave	C3	7394	P. pedifer
January	Cave	C3	7393	P. pedifer
January	Cave	C3	7391	P. pedifer
January	Cave	C3	7395	P. pedifer
January	Cave	C3	7634	P. pedifer
January	Cave	C3	7551	P. pedifer
January	Cave	C3	7562	P. pedifer
January	Cave	C3	7595	P. pedifer
January	Cave	C3	8105	P. pedifer
January	Cave	C3	8176	P. pedifer
January	Cave	C3	8180	P. pedifer
January	Cave	C3	8191	P. pedifer
January	Cave	C3	7709	P. pedifer
January	Cave	C3	7733	P. pedifer
January	Cave	C3	7737	P. pedifer
January	Cave	C3	7826	P. pedifer
January	Cave	C3	8059	P. pedifer
January	Cave	C3	8063	P. pedifer
January	Cave	C9	7793	P. pedifer
January	Cave	C9	7770	P. pedifer
January	Cave	C9	7752	P. pedifer
January	Cave	C9	7748	P. pedifer
January	Cave	C9	7626	P. pedifer
January	Cave	C9	7613	P. pedifer
January	Cave	C9	7545	P. pedifer
January	Cave	C9	7609	P. pedifer
January	Cave	C9	7625	P. pedifer
January	Cave	C9	7637	P. pedifer
January	Cave	C9	7650	P. pedifer
January	Cave	C9	7662	P. pedifer
January	Cave	C9	7669	P. pedifer
January	Cave	C9	7572	P. pedifer
January	Cave	C9	7582	P. pedifer
January	Cave	C9	7592	P. pedifer
January	Cave	C9	7410	P. pedifer
January	Cave	C9	7435	P. pedifer
January	Cave	C9	7448	P. pedifer
January	Cave	C9	7458	P. pedifer
January	Cave	C9	7937	P. pedifer
January	Cave	C9	7974	P. pedifer
January	Cave	C9	7980	P. pedifer
January	Cave	C9	8140	P. pedifer
January	Cave	C9	8159	P. pedifer
January	Cave	C9	8249	P. pedifer
January	Cave	C9	7715	P. pedifer
January	Cave	C9	7747	P. pedifer
January	Cave	C9	7756	P. pedifer
January	Cave	C9	7762	P. pedifer
January	Cave	C9	7768	P. pedifer
January	Cave	C9	7790	P. pedifer
January	Cave	C9	7796	P. pedifer
January	Cave	C9	7832	P. pedifer
January	Cave	C9	7863	P. pedifer
January	Cave	C9	7879	P. pedifer
January	Cave	C9	8003	P. pedifer
January	Cave	C9	8018	P. pedifer
January	Cave	C9	8089	P. pedifer
January	Cave	C9	8095	P. pedifer
January	Cave	C9	8318	P. pedifer
January	Cave	C9	8340	P. pedifer
January	Cave	C9	8357	P. pedifer
January	Cave	C9	8373	P. pedifer
January	Cave	C9	8379	P. pedifer
January	Cave	C9	8412	P. pedifer
January	Rocky area	R16	7960	P. pedifer
January	Rocky area	R16	7841	P. pedifer
January	Rocky area	R16	7467	P. pedifer
January	Rocky area	R16	7464	P. pedifer
January	Rocky area	R16	7466	P. pedifer
January	Rocky area	R16	7963	P. pedifer
January	Rocky area	R16	7994	P. pedifer
January	Rocky area	R16	8197	P. pedifer
January	Rocky area	R16	8260	P. pedifer
January	Rocky area	R16	8269	P. pedifer
January	Rocky area	R16	7701	P. pedifer
January	Rocky area	R16	7820	P. pedifer
January	Rocky area	R16	7842	P. pedifer
January	Rocky area	R17	7821	P. pedifer
January	Rocky area	R17	7578	P. pedifer
January	Rocky area	R17	8284	P. pedifer
January	Rocky area	R17	8288	P. pedifer
January	Rocky area	R17	7729	P. pedifer
January	Rocky area	R17	7885	P. pedifer
January	Stonefence	R17	8039	P. pedifer
January	Stonefence	S12	7477	P. pedifer
January	Stonefence	S12	7502	P. pedifer
January	Stonefence	S12	7474	P. pedifer
January	Stonefence	S12	7679	P. pedifer
January	Stonefence	S16	8056	P. pedifer
January	Stonefence	S16	7854	P. pedifer
January	Stonefence	S16	8053	P. pedifer
January	Stonefence	S17	7603	P. pedifer
January	Stonefence	S17	7517	P. pedifer
January	Stonefence	S17	7533	P. pedifer
January	Stonefence	S17	7488	P. pedifer
January	Stonefence	S17	7492	P. pedifer
January	Stonefence	S17	7496	P. pedifer
January	Stonefence	S17	8173	P. pedifer
January	Stonefence	S17	8435	P. pedifer
January	Cave	C2	8244	Sergentomyia spp.
January	Cave	C2	7896	Sergentomyia spp.
January	Cave	C2	8328	Sergentomyia spp.
January	Cave	C3	8082	Sergentomyia spp.
January	Cave	C3	8072	Sergentomyia spp.
January	Cave	C9	7644	Sergentomyia spp.
January	Cave	C9	7542	Sergentomyia spp.
January	Rocky area	R16	7824	Sergentomyia spp.
January	Rocky area	R16	7530	Sergentomyia spp.
January	Rocky area	R16	7589	Sergentomyia spp.
January	Rocky area	R16	8113	Sergentomyia spp.
January	Rocky area	R16	8221	Sergentomyia spp.
January	Stonefence	S12	8544	Sergentomyia spp.
January	Stonefence	S12	8542	Sergentomyia spp.
January	Stonefence	S12	8245	Sergentomyia spp.
January	Stonefence	S12	7981	Sergentomyia spp.
January	Stonefence	S12	7623	Sergentomyia spp.
January	Stonefence	S12	7554	Sergentomyia spp.
January	Stonefence	S12	7614	Sergentomyia spp.
January	Stonefence	S12	7618	Sergentomyia spp.
January	Stonefence	S12	7525	Sergentomyia spp.
January	Stonefence	S12	7557	Sergentomyia spp.
January	Stonefence	S12	7449	Sergentomyia spp.
January	Stonefence	S12	7459	Sergentomyia spp.
January	Stonefence	S12	7925	Sergentomyia spp.
January	Stonefence	S12	8126	Sergentomyia spp.
January	Stonefence	S12	8245	Sergentomyia spp.
January	Stonefence	S12	8255	Sergentomyia spp.
January	Stonefence	S12	7744	Sergentomyia spp.
January	Stonefence	S12	7891	Sergentomyia spp.
January	Stonefence	S12	8069	Sergentomyia spp.
January	Stonefence	S12	8086	Sergentomyia spp.
January	Stonefence	S12	8380	Sergentomyia spp.
January	Stonefence	S12	8385	Sergentomyia spp.
January	Stonefence	S12	8536	Sergentomyia spp.
January	Stonefence	S17	7536	Sergentomyia spp.
January	Stonefence	S17	7521	Sergentomyia spp.
January	Stonefence	S17	7514	Sergentomyia spp.
January	Stonefence	S17	7503	Sergentomyia spp.
January	Stonefence	S17	7388	Sergentomyia spp.
January	Stonefence	S17	7386	Sergentomyia spp.
January	Stonefence	S17	7505	Sergentomyia spp.
January	Stonefence	S17	7527	Sergentomyia spp.
January	Stonefence	S17	7586	Sergentomyia spp.
January	Stonefence	S17	8195	Sergentomyia spp.
January	Stonefence	S17	8331	Sergentomyia spp.
January	Stonefence	S17	8515	Sergentomyia spp.
July	Cave	C2	4359	Other Phlebotomus spp.
July	Cave	C2	4168	Other Phlebotomus spp.
July	Rocky area	R8	4598	Other Phlebotomus spp.
July	Stonefence	S12	4447	Other Phlebotomus spp.
July	Cave	C3	4144	Other Phlebotomus spp.
July	Cave	C2	4524	P. pedifer
July	Cave	C2	4333	P. pedifer
July	Cave	C2	4303	P. pedifer
July	Cave	C2	4275	P. pedifer
July	Cave	C2	4221	P. pedifer
July	Cave	C2	4217	P. pedifer
July	Cave	C2	4216	P. pedifer
July	Cave	C2	4170	P. pedifer
July	Cave	C2	4167	P. pedifer
July	Cave	C2	4138	P. pedifer
July	Cave	C2	4106	P. pedifer
July	Cave	C2	4100	P. pedifer
July	Cave	C2	4060	P. pedifer
July	Cave	C2	4101	P. pedifer
July	Cave	C2	4107	P. pedifer
July	Cave	C2	4131	P. pedifer
July	Cave	C2	4133	P. pedifer
July	Cave	C2	4136	P. pedifer
July	Cave	C2	4215	P. pedifer
July	Cave	C2	4261	P. pedifer
July	Cave	C2	4266	P. pedifer
July	Cave	C2	4281	P. pedifer
July	Cave	C2	4299	P. pedifer
July	Cave	C2	4358	P. pedifer
July	Cave	C2	4361	P. pedifer
July	Cave	C2	4485	P. pedifer
July	Cave	C2	4522	P. pedifer
July	Cave	C2	4525	P. pedifer
July	Cave	C2	4544	P. pedifer
July	Cave	C2	4545	P. pedifer
July	Cave	C2	4610	P. pedifer
July	Cave	C3	4328	P. pedifer
July	Cave	C3	4325	P. pedifer
July	Cave	C3	4245	P. pedifer
July	Cave	C3	4234	P. pedifer
July	Cave	C3	4231	P. pedifer
July	Cave	C3	4213	P. pedifer
July	Cave	C3	4173	P. pedifer
July	Cave	C3	4153	P. pedifer
July	Cave	C3	4148	P. pedifer
July	Cave	C3	4115	P. pedifer
July	Cave	C3	4116	P. pedifer
July	Cave	C3	4117	P. pedifer
July	Cave	C3	4147	P. pedifer
July	Cave	C3	4151	P. pedifer
July	Cave	C3	4209	P. pedifer
July	Cave	C3	4212	P. pedifer
July	Cave	C3	4233	P. pedifer
July	Cave	C3	4244	P. pedifer
July	Cave	C3	4246	P. pedifer
July	Cave	C3	4255	P. pedifer
July	Cave	C3	4326	P. pedifer
July	Cave	C3	4327	P. pedifer
July	Cave	C3	4330	P. pedifer
July	Cave	C3	4337	P. pedifer
July	Cave	C3	4339	P. pedifer
July	Cave	C3	4342	P. pedifer
July	Cave	C3	4377	P. pedifer
July	Cave	C3	4386	P. pedifer
July	Cave	C3	4461	P. pedifer
July	Cave	C3	4465	P. pedifer
July	Cave	C3	4576	P. pedifer
July	Cave	C3	4579	P. pedifer
July	Cave	C3	4594	P. pedifer
July	Cave	C5	4603	P. pedifer
July	Cave	C5	4599	P. pedifer
July	Cave	C5	4076	P. pedifer
July	Cave	C5	4065	P. pedifer
July	Cave	C5	4066	P. pedifer
July	Cave	C5	4566	P. pedifer
July	Cave	C5	4601	P. pedifer
July	Cave	C5	4422	P. pedifer
July	Cave	C9	4419	P. pedifer
July	Cave	C9	4279	P. pedifer
July	Cave	C9	4113	P. pedifer
July	Cave	C9	4114	P. pedifer
July	Cave	C9	4119	P. pedifer
July	Cave	C9	4121	P. pedifer
July	Cave	C9	4124	P. pedifer
July	Cave	C9	4125	P. pedifer
July	Cave	C9	4277	P. pedifer
July	Cave	C9	4278	P. pedifer
July	Cave	C9	4305	P. pedifer
July	Cave	C9	4371	P. pedifer
July	Cave	C9	4372	P. pedifer
July	Cave	C9	4420	P. pedifer
July	Cave	C9	4421	P. pedifer
July	Cave	C9	4471	P. pedifer
July	Cave	C9	4472	P. pedifer
July	Cave	C9	4473	P. pedifer
July	Cave	C9	4582	P. pedifer
July	Cave	C9	4585	P. pedifer
July	Cave	C9	4613	P. pedifer
July	Rocky area	R17	4625	P. pedifer
July	Rocky area	R17	4592	P. pedifer
July	Rocky area	R17	4481	P. pedifer
July	Rocky area	R17	4207	P. pedifer
July	Rocky area	R17	4070	P. pedifer
July	Rocky area	R17	4206	P. pedifer
July	Rocky area	R17	4410	P. pedifer
July	Rocky area	R17	4478	P. pedifer
July	Rocky area	R17	4589	P. pedifer
July	Rocky area	R8	4595	P. pedifer
July	Rocky area	R8	4540	P. pedifer
July	Rocky area	R8	4347	P. pedifer
July	Rocky area	R8	4408	P. pedifer
July	Rocky area	R8	4458	P. pedifer
July	Rocky area	R8	4539	P. pedifer
July	Rocky area	R17	4597	P. pedifer
July	Stonefence	S12	4623	P. pedifer
July	Stonefence	S12	4560	P. pedifer
July	Stonefence	S12	4498	P. pedifer
July	Stonefence	S12	4495	P. pedifer
July	Stonefence	S12	4491	P. pedifer
July	Stonefence	S12	4448	P. pedifer
July	Stonefence	S12	4294	P. pedifer
July	Stonefence	S12	4253	P. pedifer
July	Stonefence	S12	4250	P. pedifer
July	Stonefence	S12	4227	P. pedifer
July	Stonefence	S12	4193	P. pedifer
July	Stonefence	S12	4189	P. pedifer
July	Stonefence	S12	4413	P. pedifer
July	Stonefence	S12	4446	P. pedifer
July	Stonefence	S12	4496	P. pedifer
July	Stonefence	S9	4629	P. pedifer
July	Stonefence	S9	4442	P. pedifer
July	Stonefence	S9	4440	P. pedifer
July	Stonefence	S9	4398	P. pedifer
July	Stonefence	S9	4397	P. pedifer
July	Stonefence	S9	4172	P. pedifer
July	Stonefence	S9	4166	P. pedifer
July	Stonefence	S9	4165	P. pedifer
July	Stonefence	S9	4159	P. pedifer
July	Stonefence	S9	4049	P. pedifer
July	Stonefence	S9	4155	P. pedifer
July	Stonefence	S9	4161	P. pedifer
July	Stonefence	S9	4164	P. pedifer
July	Stonefence	S9	4399	P. pedifer
July	Stonefence	S9	4424	P. pedifer
July	Stonefence	S9	4433	P. pedifer
July	Stonefence	S9	4573	P. pedifer
July	Cave	C2	4103	Sergentomyia spp.
July	Cave	C2	4097	Sergentomyia spp.
July	Cave	C2	4104	Sergentomyia spp.
July	Cave	C2	4139	Sergentomyia spp.
July	Cave	C2	4141	Sergentomyia spp.
July	Cave	C2	4318	Sergentomyia spp.
July	Cave	C2	4332	Sergentomyia spp.
July	Cave	C2	4366	Sergentomyia spp.
July	Cave	C2	4429	Sergentomyia spp.
July	Cave	C2	4554	Sergentomyia spp.
July	Cave	C3	4145	Sergentomyia spp.
July	Cave	C3	4174	Sergentomyia spp.
July	Cave	C3	4335	Sergentomyia spp.
July	Cave	C3	4344	Sergentomyia spp.
July	Cave	C3	4354	Sergentomyia spp.
July	Cave	C3	4515	Sergentomyia spp.
July	Cave	C5	4505	Sergentomyia spp.
July	Cave	C5	4178	Sergentomyia spp.
July	Cave	C5	4067	Sergentomyia spp.
July	Cave	C5	4602	Sergentomyia spp.
July	Cave	C9	4123	Sergentomyia spp.
July	Cave	C9	4120	Sergentomyia spp.
July	Rocky area	R17	4451	Sergentomyia spp.
July	Rocky area	R17	4364	Sergentomyia spp.
July	Rocky area	R17	4331	Sergentomyia spp.
July	Rocky area	R17	4290	Sergentomyia spp.
July	Rocky area	R17	4205	Sergentomyia spp.
July	Rocky area	R17	4321	Sergentomyia spp.
July	Rocky area	R17	4324	Sergentomyia spp.
July	Rocky area	R17	4363	Sergentomyia spp.
July	Rocky area	R17	4620	Sergentomyia spp.
July	Rocky area	R8	4617	Sergentomyia spp.
July	Rocky area	R8	4348	Sergentomyia spp.
July	Rocky area	R8	4048	Sergentomyia spp.
July	Rocky area	R8	4617	Sergentomyia spp.
July	Stonefence	S12	4224	Sergentomyia spp.
July	Stonefence	S12	4222	Sergentomyia spp.
July	Stonefence	S12	4198	Sergentomyia spp.
July	Stonefence	S12	4195	Sergentomyia spp.
July	Stonefence	S12	4187	Sergentomyia spp.
July	Stonefence	S12	4111	Sergentomyia spp.
July	Stonefence	S12	4082	Sergentomyia spp.
July	Stonefence	S12	4043	Sergentomyia spp.
July	Stonefence	S12	4501	Sergentomyia spp.
July	Stonefence	S12	4044	Sergentomyia spp.
July	Stonefence	S12	4111	Sergentomyia spp.
July	Stonefence	S9	4085	Sergentomyia spp.
July	Stonefence	S9	4068	Sergentomyia spp.
July	Stonefence	S9	4091	Sergentomyia spp.
July	Stonefence	S9	4292	Sergentomyia spp.
July	Stonefence	S9	4401	Sergentomyia spp.
July	Stonefence	S9	4438	Sergentomyia spp.
July	Stonefence	S9	4402	Sergentomyia spp.
July	Stonefence	S9	4441	Sergentomyia spp.
